# Supplementary material for: Disparities in Mitral Valve Disease Associated with Heart Failure
Source: PubMed Central journal article supplement (PMC11264015; doi:10.31083/j.rcm2504129), 2024-04-01
Supplement: 2153-8174-25-4-129-s1.pdf [file 2153-8174-25-4-129-s1.pdf]

**MR + HF Total Deaths based on Gender:**

| Year  | Male  | Female |
|-------|-------|--------|
| 1999  | 1070  | 1981   |
| 2000  | 1016  | 1931   |
| 2001  | 978   | 1848   |
| 2002  | 941   | 1750   |
| 2003  | 919   | 1674   |
| 2004  | 932   | 1609   |
| 2005  | 932   | 1731   |
| 2006  | 911   | 1546   |
| 2007  | 892   | 1494   |
| 2008  | 899   | 1444   |
| 2009  | 844   | 1474   |
| 2010  | 841   | 1461   |
| 2011  | 849   | 1416   |
| 2012  | 826   | 1389   |
| 2013  | 850   | 1454   |
| 2014  | 946   | 1470   |
| 2015  | 952   | 1605   |
| 2016  | 1059  | 1681   |
| 2017  | 1170  | 1615   |
| 2018  | 1170  | 1762   |
| 2019  | 1244  | 1772   |
| 2020  | 1330  | 1838   |
| Total | 21571 | 35945  |

**MS + HF Total Deaths based on Gender:**

| Year   | Male | Female |
|--------|------|--------|
| 1999   | 101  | 460    |
| 2000   | 92   | 408    |
| 2001   | 63   | 392    |
| 2002   | 71   | 284    |
| 2003   | 65   | 322    |
| 2004   | 68   | 263    |
| 2005   | 55   | 291    |
| 2006   | 47   | 243    |
| 2007   | 70   | 235    |
| 2008   | 47   | 269    |
| 2009   | 62   | 264    |
| 2010   | 69   | 231    |
| 2011   | 56   | 272    |
| 2012   | 65   | 283    |
| 2013   | 74   | 265    |
| 2014   | 91   | 285    |
| 2015   | 83   | 326    |
| 2016   | 112  | 387    |
| 2017   | 111  | 379    |
| 2018   | 132  | 396    |
| 2019   | 140  | 419    |
| 2020   | 141  | 490    |
| Total: | 1815 | 7164   |
